# Supplementary material for: Molecular Cloning and Functional Characterization of Tibetan Porcine STING
Source: Int J Mol Sci. 2012 Jan 4;13(1):506–15. doi: 10.3390/ijms13010506 (PMC3269701; doi:10.3390/ijms13010506)
Supplement: Supplementary file 1 [file ijms-13-00506-s001.pdf]

**Figure S1.** Nucleotide and predicted amino acid sequences of Tibetan porcine STING. The numbers on the left refer to positions of the nucleotides or amino acid residues. The stop codon is indicated by \*.

|      |                                                               |
|------|---------------------------------------------------------------|
| 1    | ATGCCCTACTCCAGCCTGCATCCATCCATCCCACAGCCCAGGGGCCTCAGGGCTCAGGAG  |
| 1    | M P Y S S L H P S I P Q P R G L R A Q E                       |
| 61   | GCAGCCCTGGTCCTTCTAGGTGCCTGCCTGGTGGCCCTTTGGGGGCTGGGGGAGCTGCCA  |
| 21   | A A L V L L G A C L V A L W G L G E L P                       |
| 121  | GAATACACGCTCCGGTGGCTGGTGTCCACCTGGCCTCCCAGCAGATAGGACTGTGGTG    |
| 41   | E Y T L R W L V L H L A S Q Q I G L L V                       |
| 181  | AAGGGGCTTGCAGTCTGGCGGAGGAGCTGTGCCACGTCCACTCCAGGTACCAGAGCAGC   |
| 61   | K G L C S L A E E L C H V H S R Y Q S S                       |
| 241  | TACTGGAGGGCTGCGTGGGCCTGCCTGGGCTGCCCCATCCGCTGTGGAGCCCTGCTGCTG  |
| 81   | Y W R A A W A C L G C P I R C G A L L L                       |
| 301  | CTGTCTGCTACTTCTACTTCTCCATCCGAGACAAGGCTGGCCTGCCCTCCCTCCCTGGATG |
| 101  | L S C Y F Y F S I R D K A G L P L P W M                       |
| 361  | CTGGCCCTCCTGGGCCTCTCGCAGGCCCTAAACATCCTCCTGGGCCTCCAGCACCTGGCC  |
| 121  | L A L L G L S Q A L N I L L G L Q H L A                       |
| 421  | CCAGCTGAAGTCTCTGCAATCTGTGAAAAAAGGAACCTCAACGTGGCTCATGGACTGGCC  |
| 141  | P A E V S A I C E K R N F N V A H G L A                       |
| 481  | TGGTCTTATTACATCGGGTACCTGCGGCTGATCCTCCAGGGCTCCGGGCCCGGATCCAA   |
| 161  | W S Y Y I G Y L R L I L P G L R A R I Q                       |
| 541  | GCTTATAATCAGCGCCACAAGAACGTACTCGGGGCATAGGGAACCAACGGCTGCACATC   |
| 181  | A Y N Q R H K N V L G G I G N H R L H I                       |
| 601  | CTCTTTCCGTTGACTGTGGGGCGCCCGACGACCTGAGCGTGGCTGACCCCAACATTCCG   |
| 201  | L F P L D C G A P D D L S V A D P N I R                       |
| 661  | TTCCTGCACAAGCTGCCCCAGCAAAGTGCCGACCGTGTGGCATCAAGGGCCGGGTGTAC   |
| 221  | F L H K L P Q Q S A D R A G I K G R V Y                       |
| 721  | ACCAACAGCATCTATGAGCTTCTGGAGAACGGGCAGCCGGCAGGCGTCTGTGTCTCTGGAG |
| 241  | T N S I Y E L L E N G Q P A G V C V L E                       |
| 781  | TACGCCACTCCCTTGCAGACCTTGTTGCGCATGTACAGGATGGCCGCGCTGGCTTCAGC   |
| 261  | Y A T P L Q T L F A M S Q D G R A G F S                       |
| 841  | CGGGAGGATCGGCTCGAGCAGGCCAAACTCTTCTGCCGGACCCCTCGAAGACATCCTGGCA |
| 281  | R E D R L E Q A K L F C R T L E D I L A                       |
| 901  | GATGCCCCGTAGGGCTCAGAACAACTGCCGCCTCATCGTCTACCAGGAACCCACAGAGGGA |
| 301  | D A P E A Q N N C R L I V Y Q E P T E G                       |
| 961  | GGCAGCTTCTCCCTGTGCGCAGGAGATTCTCCGGCACCTTCGGCAGGAGGAAAGGGAGGTT |
| 321  | G S F S L S Q E I L R H L R Q E E R E V                       |
| 1021 | ACCATGGGCAGTGGGAGACCTCAGTGGTGGCCACTTCTCCACGCTGTCCCAAGAGCCT    |
| 341  | T M G S A E T S V V P T S S T L S Q E P                       |
| 1081 | GAGCTCCTCATCAGTGGCATGGAAACAGCCTCTTCCACTCCGCTCAGATATCTTCTGA    |
| 361  | E L L I S G M E Q P L P L R S D I F *                         |
